# Supplementary material for: Benefits of the Growing up Together Online Parenting Program for Families in Social Services in Croatia
Source: Springer Nature journal article supplement (doi:10.1007/s10826-023-02770-2), 2024-01-02
Supplement: MOESM1 [file 26587312]

**Table S1**

*Sensitivity Analysis of Pre- and Post-Intervention Levels of Parental Cognitions and Behavior of Parents Having One Child*

|  | Pre-intervention  (*n* = 44) | | Post-intervention  (*n* = 44) | |  | |  | |  |  |
| --- | --- | --- | --- | --- | --- | --- | --- | --- | --- | --- |
|  | *M* | *SD* | *M* | *SD* | | *t*-value | | Cohen’s *d* | CI 95% | *p*-value |
| *Parental Cognitions* |  |  |  |  | |  | |  |  |  |
| General self-esteem | 23.16 | 5.20 | 25.27 | 4.35 | | 4.29 | | 0.65 | [0.32, 0.97] | < .001 |
| Parenting self-efficacy | 38.86 | 4.34 | 39.50 | 3.68 | | 2.20 | | 0.33 | [0.03, 0.63] | .033 |
| Parenting experience | 24.43 | 4.24 | 26.30 | 2.92 | | 3.61 | | 0.55 | [0.23, 0.86] | < .001 |
| Parenting morale | 33.23 | 5.71 | 36.73 | 4.36 | | 4.27 | | 0.64 | [0.32, 0.97] | < .001 |
| *Parenting Behavior* |  |  |  |  | |  | |  |  |  |
| Attempted understanding | 17.52 | 2.38 | 17.64 | 2.07 | | 0.35 | | 0.05 | [−0.24, 0.35] | .731 |
| Positive involvement and reinforcementa | 17.37 | 2.81 | 17.65 | 2.41 | | 0.92 | | 0.14 | [−0.16, 0.44] | .361 |
| Angry outbursts | 8.11 | 2.99 | 7.45 | 2.33 | | −1.77 | | −0.27 | [−0.56, 0.04] | .084 |
| Physical and emotional harshnessa | 5.05 | 2.37 | 4.37 | 1.69 | | −2.69 | | −0.41 | [−0.72, −0.10] | .010 |

*Note.* a*n* = 43

**Table S2**

*Sensitivity Analysis of Pre- and Post-Intervention Levels of Parental Cognitions and Behavior of Mothers*

|  | Pre-intervention  (*n* = 54) | | Post-intervention  (*n* = 54) | |  | |  | |  |  |
| --- | --- | --- | --- | --- | --- | --- | --- | --- | --- | --- |
|  | *M* | *SD* | *M* | *SD* | | *t*-value | | Cohen’s *d* | CI 95% | *p*-value |
| *Parental Cognitions* |  |  |  |  | |  | |  |  |  |
| General self-esteem | 22.98 | 4.91 | 24.93 | 4.30 | | 3.95 | | 0.54 | [0.25, 0.82] | < .001 |
| Parenting self-efficacy | 38.07 | 4.29 | 39.22 | 3.67 | | 2.33 | | 0.32 | [0.04, 0.59] | .023 |
| Parenting experience | 24.54 | 4.05 | 26.33 | 2.91 | | 4.02 | | 0.55 | [0.25, 0.82] | < .001 |
| Parenting morale | 32.85 | 5.42 | 35.54 | 4.53 | | 3.57 | | 0.49 | [0.20, 0.77] | < .001 |
| *Parenting Behavior* |  |  |  |  | |  | |  |  |  |
| Attempted understanding | 17.56 | 2.09 | 17.80 | 1.97 | | 0.80 | | 0.11 | [−0.16, 0.38] | .428 |
| Positive involvement and reinforcementa | 17.55 | 2.52 | 17.79 | 2.37 | | 0.91 | | 0.13 | [−0.15, 0.39] | .369 |
| Angry outbursts | 8.50 | 3.14 | 7.50 | 2.30 | | −2.56 | | −0.35 | [−0.62, −0.07] | .013 |
| Physical and emotional harshnessa | 5.19 | 2.50 | 4.40 | 1.80 | | −2.88 | | −0.40 | [−0.67, −0.11] | .006 |

*Note.* a*n* = 53
